# Supplementary material for: Systemic administration of heparin ameliorates radiation-induced oral mucositis—preclinical studies in mice
Source: PubMed Central journal article supplement (PMC6008356; doi:10.1007/s00066-018-1300-8), 2018-04-16
Supplement: 66_2018_1300_MOESM1_ESM.pdf [file 66_2018_1300_MOESM1_ESM.pdf]

Ms. No. SUON-D-18-00031 Systemic administration of heparin ameliorates radiation-induced oral mucositis – preclinical studies in mice

Strahlentherapie und Onkologie

Maria Kowaliuk<sup>1</sup>, Eva Bozsaky<sup>1</sup>, Sylvia Gruber<sup>1</sup>, Peter Kuess<sup>2</sup>, Wolfgang Dörr<sup>1</sup>

<sup>1</sup>Medical University of Vienna, Department of Radiotherapy- ATRAB - Applied and Translational Radiobiology and Christian Doppler Laboratory for Medical Radiation Research for Radiation Oncology, Vienna, Austria

<sup>2</sup>Medical University of Vienna, Department of Radiotherapy- Christian Doppler Laboratory for Medical Radiation Physics for Radiation Oncology

Corresponding author:

Maria Kowaliuk

E-mail address: [maria.kowaliuk@meduniwien.ac.at](mailto:maria.kowaliuk@meduniwien.ac.at)

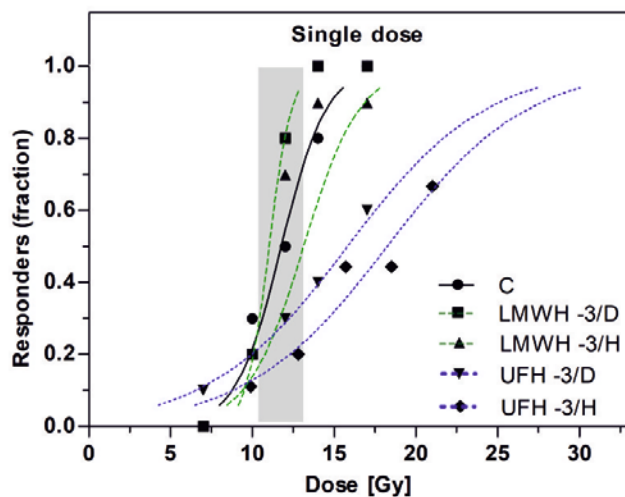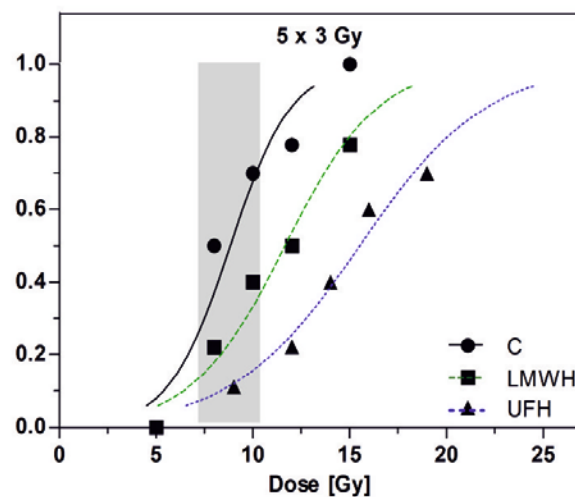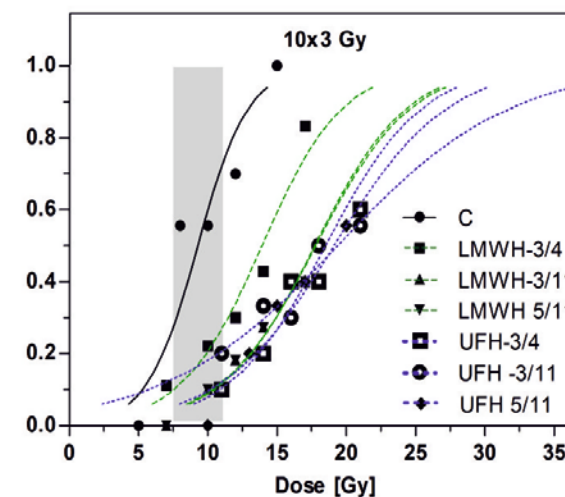

**Online Resource 1 Local test irradiation full dose-response curves for heparin effect on the radiation-induced oral mucositis after single dose (a) and fractionated irradiation over one (b) or two (c) weeks.**

Each curve represents the dose response of the test irradiation based on one experiment with 5 graded dose groups with 10 animals each, performed either with UFH or LMWH given over varying time intervals. Responders are defined as animals developing mucosal ulcerations. Shaded area displays the  $ED_{50} \pm 1SD$  of the corresponding control experiment (irradiation alone). The corresponding  $ED_{50}$  and p-values are given in Table 1. C: control; D: first diagnosis of the ulceration; H: healing of the ulceration.
